# Supplementary material for: Simulating the Commercial Implementation of Gene-Editing for Influenza A Virus Resistance in Pigs: An Economic and Genetic Analysis
Source: MDPI journal article supplement (doi:10.3390/genes13081436), 2022-08-12
Supplement: s1 [file s1]

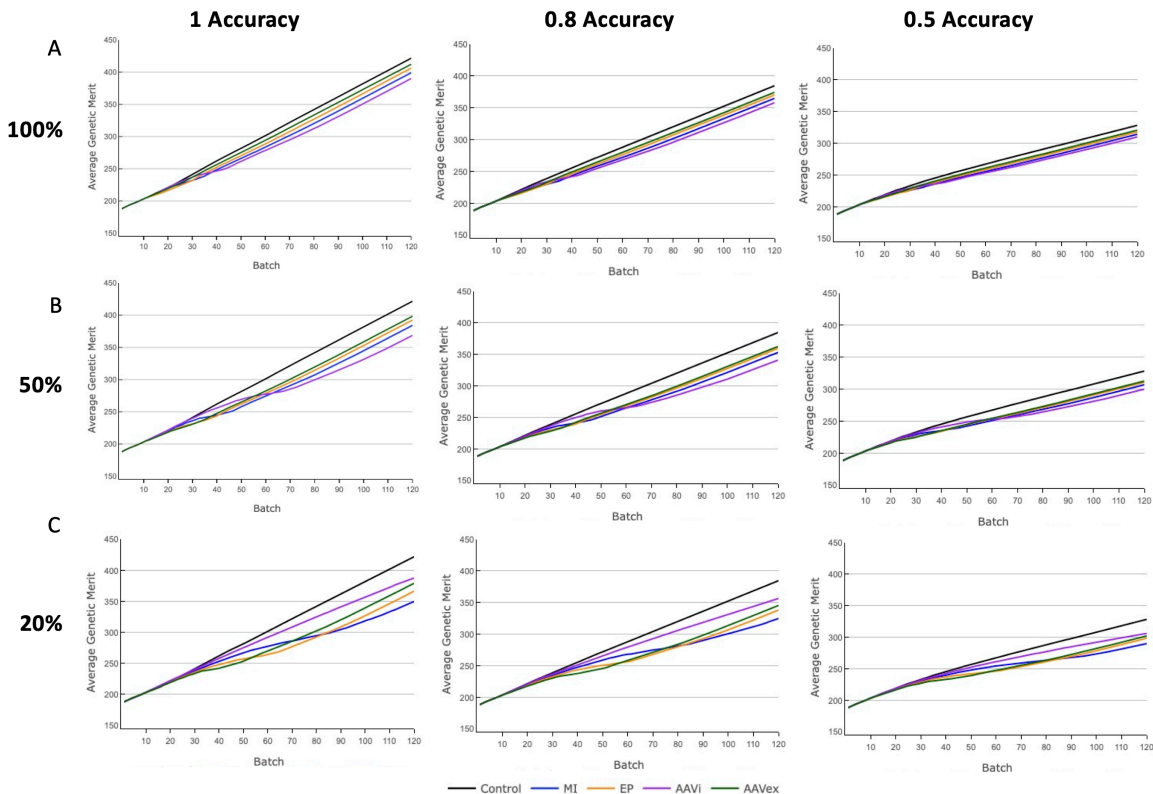

**Figure S5:** Genetic merit trend of piglets in the Finisher herd in a digenic gene-editing program with linked allele inheritance. MI = Microinjection. EP = Electroporation. AAVi = AAV *in vivo*. AAVex = AAV *ex vivo*. A) 100% germline transmission. B) 50% germline transmission. C) 20% germline transmission.
