# Supplementary material for: Simulating the Commercial Implementation of Gene-Editing for Influenza A Virus Resistance in Pigs: An Economic and Genetic Analysis
Source: MDPI journal article supplement (doi:10.3390/genes13081436), 2022-08-12
Supplement: s1 [file s1]

1 Accuracy

0.5 Accuracy

Linked

Independent

Linked

Independent

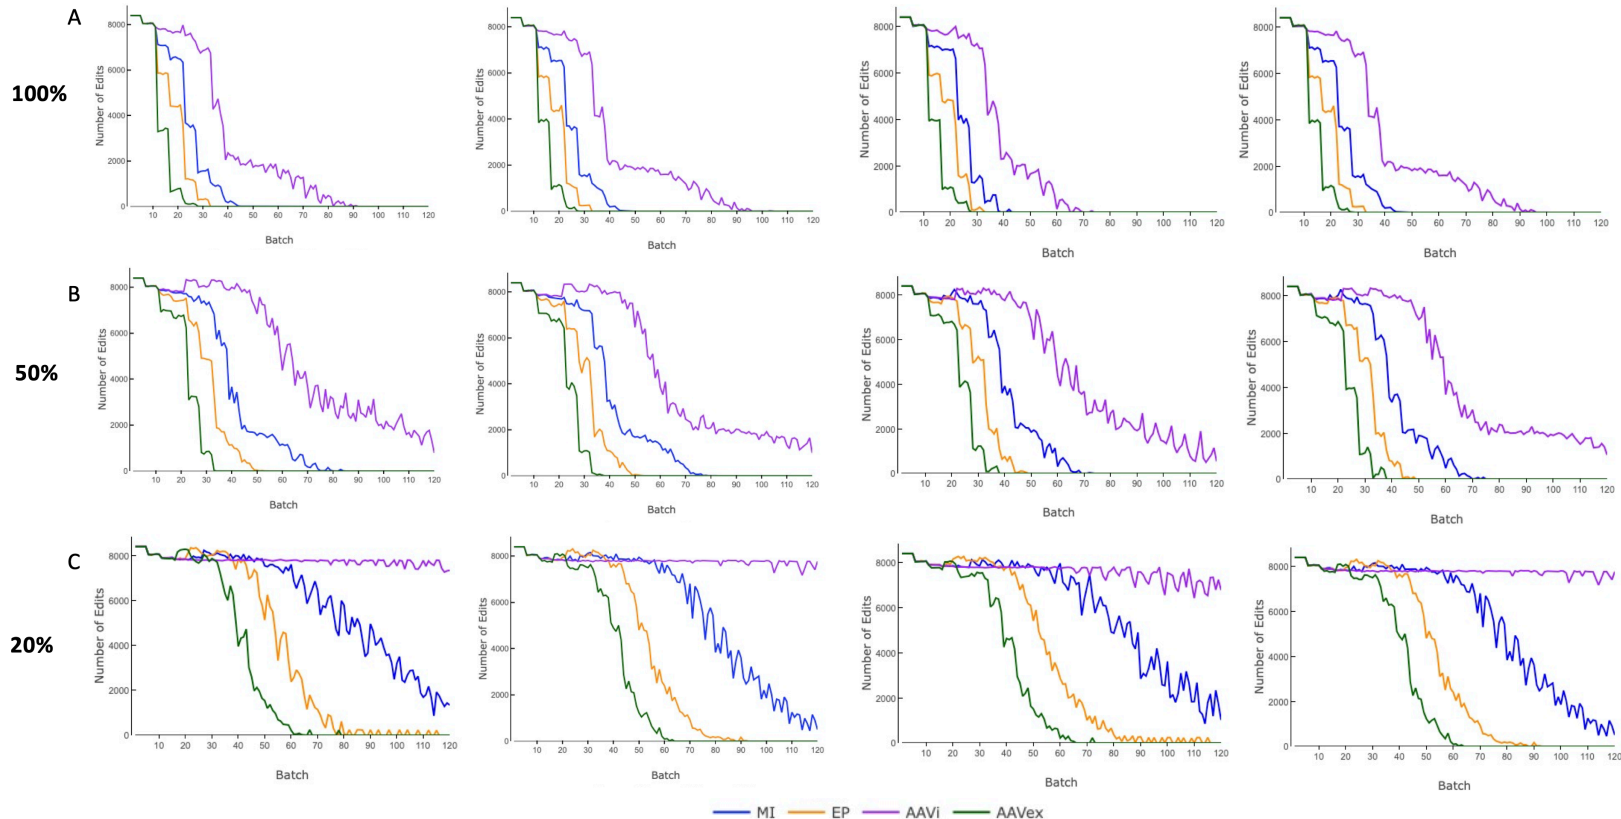

**Figure S4:** Number of zygotes attempted to be gene-edited in the Nucleus tier in a digenic gene-editing program for linked and independent inheritance. MI = Microinjection. EP = Electroporation. AAVi = AAV *in vivo*. AAVex = AAV *ex vivo*. A) 100% germline transmission. B) 50% germline transmission. C) 20% germline transmission.
