# Supplementary material for: Simulating the Commercial Implementation of Gene-Editing for Influenza A Virus Resistance in Pigs: An Economic and Genetic Analysis
Source: MDPI journal article supplement (doi:10.3390/genes13081436), 2022-08-12
Supplement: s1 [file s1]

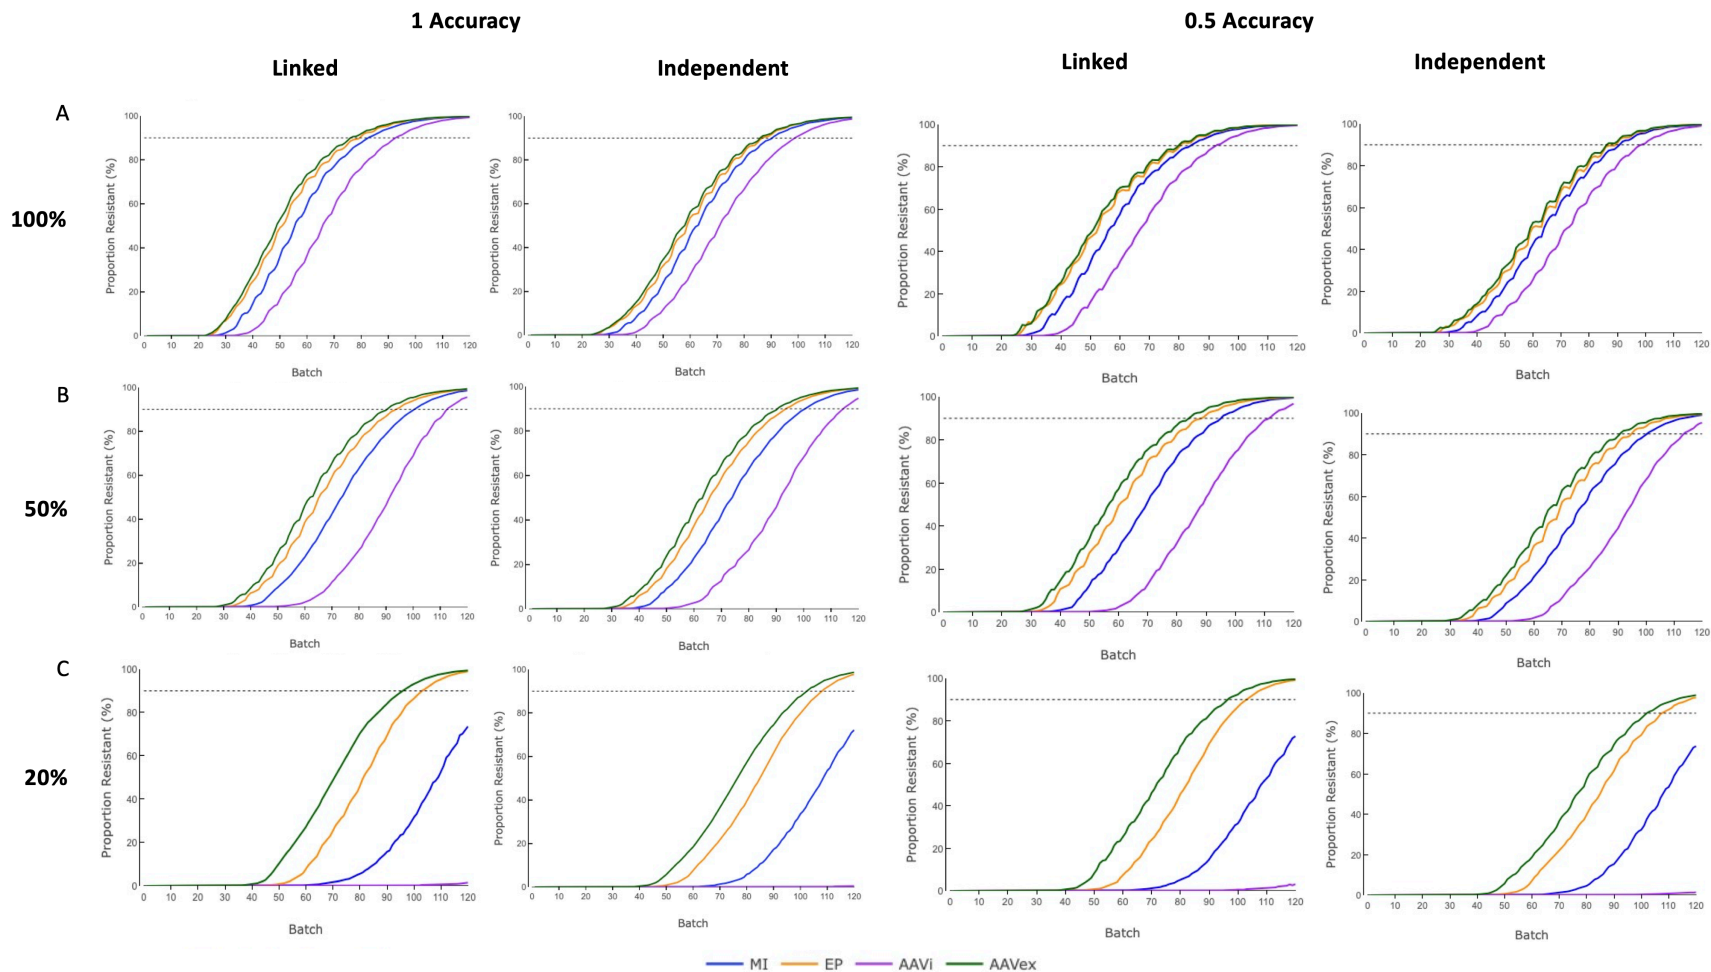

**Figure S3:** The proportion of phenotypically resistant pigs in the Finisher herd in a gene-editing scenario of digenic sIAV resistance with 1 and 0.5 selection accuracy. Changing of selection accuracy did not affect the dissemination of alleles. MI = Microinjection. EP = Electroporation. AAVi = AAV *in vivo*. AAVex = AAV *ex vivo*. Alleles were inherited in a completely linked or independent manner. A) 100% mosaicism. B) 50% mosaicism. C) 20% mosaicism.
