# Supplementary material for: Simulating the Commercial Implementation of Gene-Editing for Influenza A Virus Resistance in Pigs: An Economic and Genetic Analysis
Source: MDPI journal article supplement (doi:10.3390/genes13081436), 2022-08-12
Supplement: s1 [file s1]

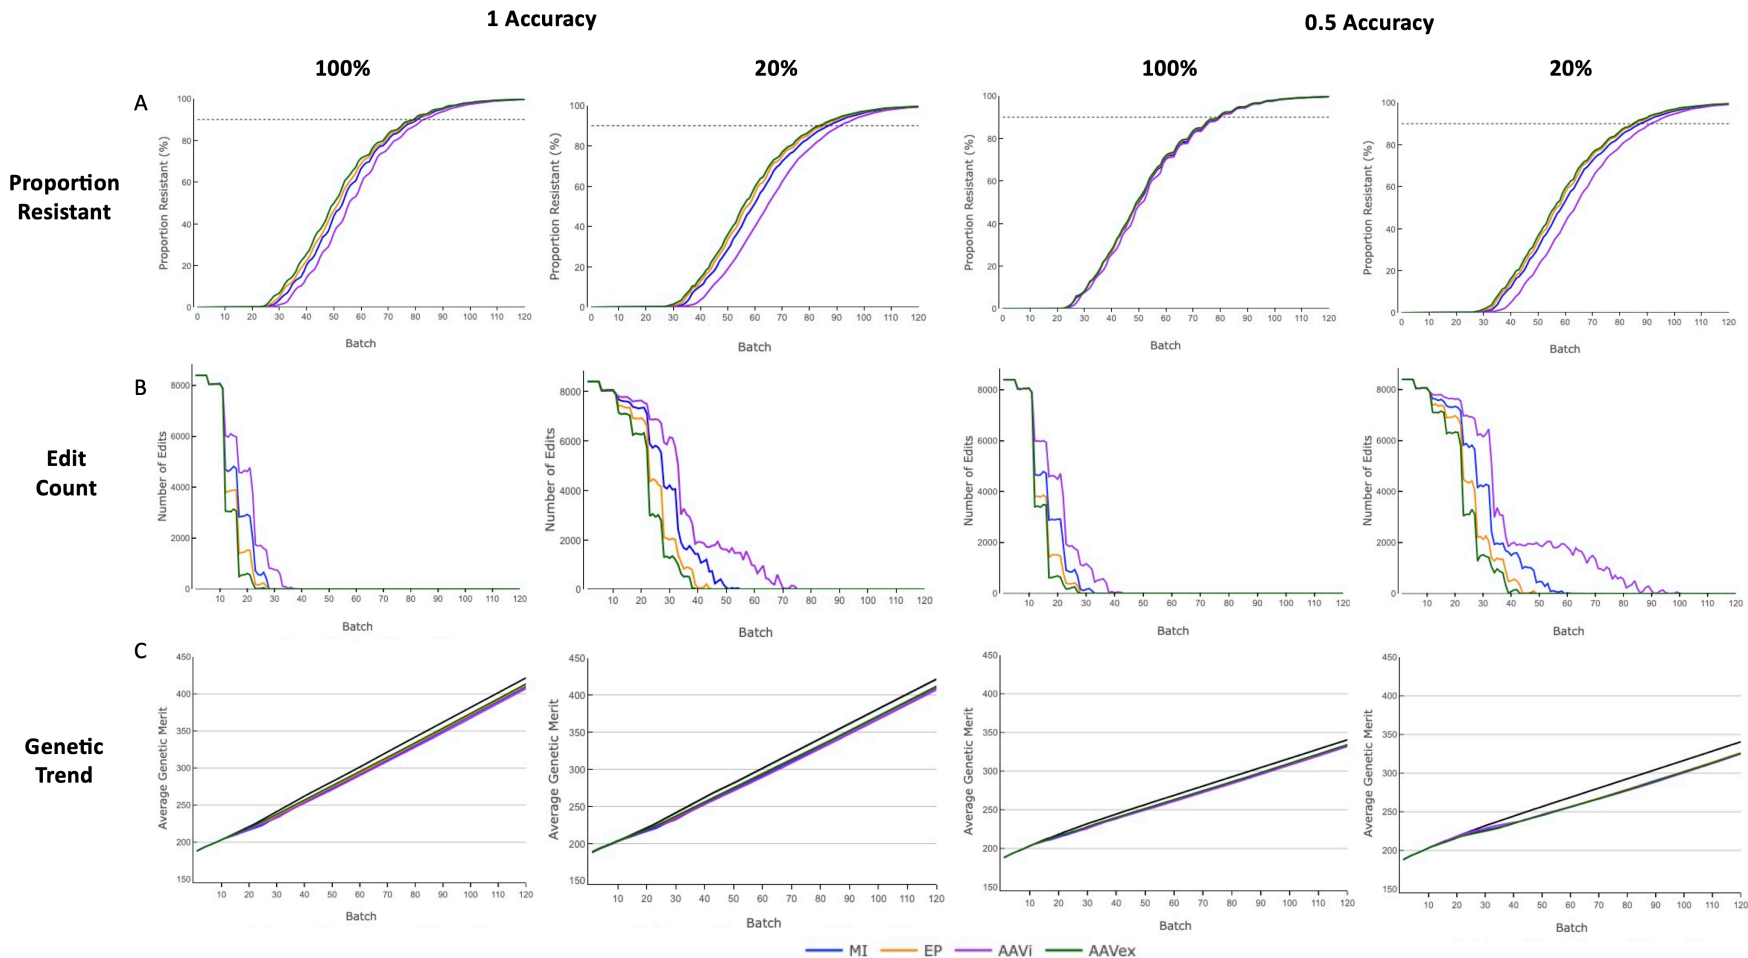

**Figure S2:** Monogenic resistance with 1 and 0.5 accuracy and 100 or 20% mosaicism. MI = Microinjection. EP = Electroporation. AAVi = AAV *in vivo*. AAVex = AAV *ex vivo*. A) Proportion of pigs with phenotypic resistance to swIAV in the Finisher Herd. B) Total count of zygotes attempted to be gene-edited across all Nucleus herds per batch. C) Mean genetic merit of pigs in the Finisher Herd.
